# Supplementary material for: Arrhythmias and Device Therapies in Cardiac Amyloidosis
Source: Preprints.org preprint supplement (doi:10.20944/preprints202401.1316.v1), 2024-01-17
Supplement: Supplementary file 1 [file supplementary]

**Table 1: Studies demonstrating use of ICD in CA**

| Study | Population Demographics with ICD | ICD for primary prevention,  N (%) | Successful ICD therapy, % | Mean Age, years | Mean Follow up duration, months | 1-year survival,  % |
| --- | --- | --- | --- | --- | --- | --- |
| Kristen et al.43 | N=19 | 19 (100) | 11 | 58 | 27 ± 5.0 | 63 |
| Varr et al.44 | N=19  AL- 15  ATTR- 4 | 15 (79) | 26 | 68 | NA | 50 |
| Hamon et al.45 | N=45  AL-12  ATTR-33 | 38 (84) | 27 | 66 | 17 ± 14 | 73 |
| Lin et al.46 | N=53  AL-33  ATTR-19 | 41 (77) | 32 | 64 | 23 ± 21 | 22 |
| Hiigins et al.47 | N=472 | 359 (76) | NA | 68 | NA | 73 |
| Donnellan et al.48 | N=19  ATTR- 19 | 19 (100) | NA | 73 | 23 ± 19 | 16 |
| Brown et al.49 | N=32  ATTR- 32 | 32 (100) | 25 | 74 | 38 ± 3.6 | 75 |

ICD: Implantable cardioverter-defibrillator; CA: Cardiac amyloidosis
